# Supplementary material for: Raman spectroscopy in microsurgery: impact of operating microscope illumination sources on data quality and tissue classification
Source: Royal Society of Chemistry journal article supplement (doi:10.1039/c6an02061e), 2016-10-31
Supplement: c6an02061e1.pdf [file c6an02061e1.pdf]

SUPPLEMENTAL MATERIAL

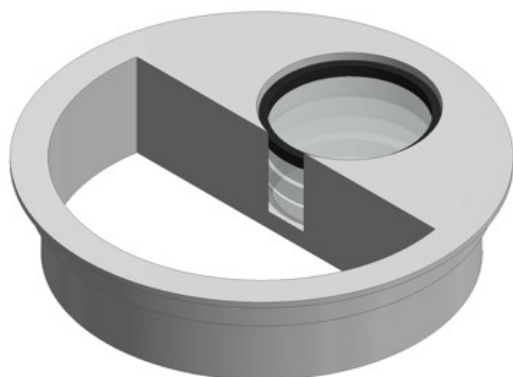

Figure S1 : 3D modelisation of the filter adapter used on the neurosurgical microscope. The piece was 3D printed using white ABS plastic and the three filters were placed in the circular hole and held in place using a retaining ring
